# Supplementary material
Source: PubMed Central journal article supplement (PMC8207535)

# SUPPLEMENTAL FIGURE 1

| <b>A</b>           | Membrane Capacitance<br>Cm (pF) | Membrane Resistance<br>Rm (MΩ) | Decay Time Constant<br>Tau (ms) | Membrane Potential<br>Vm (mV) |
|--------------------|---------------------------------|--------------------------------|---------------------------------|-------------------------------|
| Male<br>(n = 11)   | 38.0 ± 5.8                      | 548.9 ± 102.8                  | 413.5 ± 105.4                   | -48.6 ± 2.3                   |
| Female<br>(n = 12) | 39.4 ± 5.0                      | 486.8 ± 67.4                   | 284.6 ± 57.3                    | -44.9 ± 2.1                   |

## B

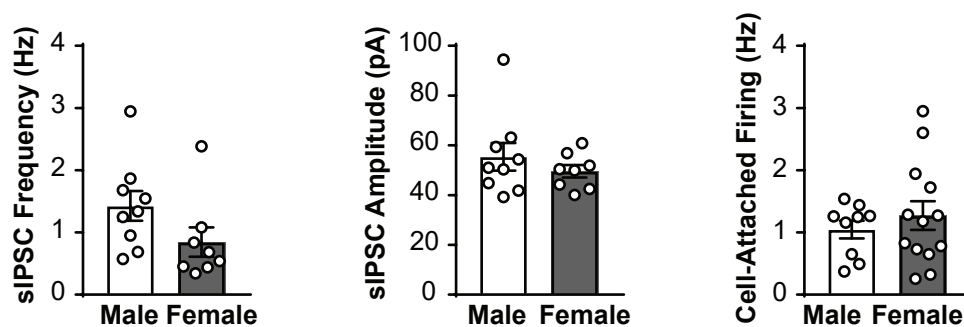

## C

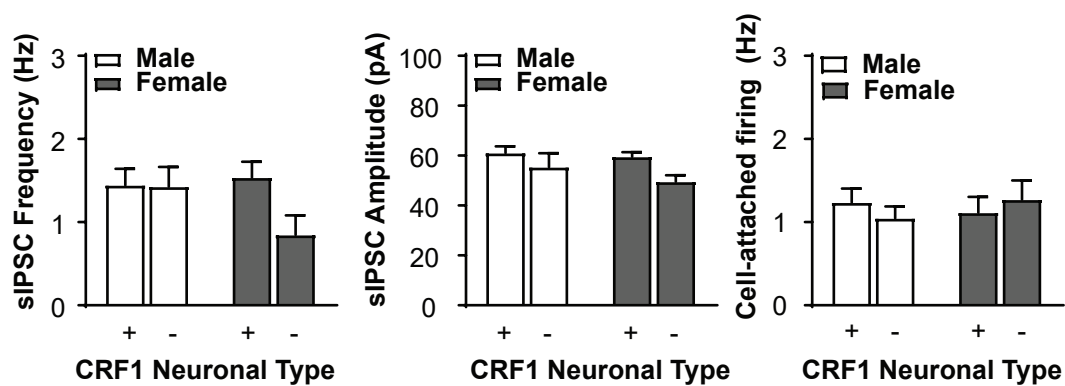

Supplement: NIHMS1631971-supplement-1.pdf [file NIHMS1631971-supplement-1.pdf]
